# Supplementary material
Source: publisher figshare collection journal article supplement (https://acs.figshare.com/ndownloader/files/3601002)
Supplement: Supplementary file 1 [file 3601002]

## Supporting Information: DNA Interstrand Cross-Linking Upon Irradiation of Aryl Halide C-Nucleotides.

*Dianjie Hou and Marc M. Greenberg\**

Department of Chemistry, Johns Hopkins University, 3400 N. Charles St., Baltimore, MD 21218

mgreenberg@jhu.edu

### Contents:

1. **Supporting Information Figure 1.** Steady-state nucleotide incorporation by Deep Vent (exo<sup>-</sup>) opposite dC in 5'-<sup>32</sup>P-**20**. (S2)
2. **Supporting Information Figure 2.** Sample autoradiogram of hydroxyl radical digestion of cross-linked DNA produced upon UV-irradiation of **16b-18b**. (S2)
3. **Supporting Information Figure 3.** MALDI-TOF MS of interstrand cross-link products from irradiation of C-nucleotide containing duplexes. (S3)
4. **Supporting Information Figure 4.** NMR spectra of known compounds used to prepare oligonucleotide **13**. (S4-S6)
5. **Supporting Information Figure 5.** NMR spectra of **5**. (S7)
6. **Supporting Information Figure 6.** NMR spectra of dimethoxytritylated **5**. (S8)
7. **Supporting Information Figure 7.** NMR spectra of **10a**. (S9)
8. **Supporting Information Figure 8.** NMR spectra of **6**. (S10)
9. **Supporting Information Figure 9.** NMR spectra of dimethoxytritylated **6**. (S11)
10. **Supporting Information Figure 10.** NMR spectra of **10b**. (S12)
11. **Supporting Information Figure 11.** NMR spectra of **19**. (S13)
12. **Supporting Information Figure 12.** MALDI-TOF MS of oligonucleotides containing C-nucleotides (**13-15**). (S14)
13. **Supporting Information Figure 13.** Sample ICL gel upon UV-irradiation of 5'-<sup>32</sup>P-**17a-d**. (S15)

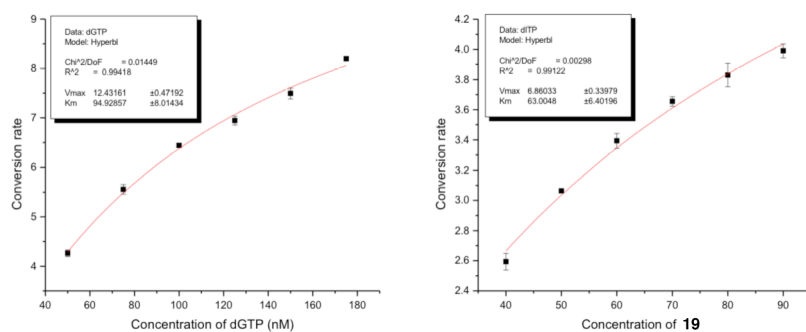

**Supporting Information Figure 2.** Steady-state nucleotide incorporation by Deep Vent (exo<sup>-</sup>) opposite dC in 5'-<sup>32</sup>P-20. (Left) dGTP as substrate; (Right) **19** as substrate.

5'-d(CGA GTA CTG C A X AA CGT GTA CAG C)  
 3'-d(GCT CAT GAC GT<sub>15</sub>T<sub>14</sub> C<sub>13</sub>TT GCA CAT GTC G)

**16b X = 4**  
**17b X = 5**  
**18b X = 6**

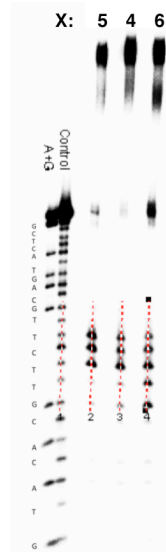

**Supporting Information Figure 2.** Sample autoradiogram of hydroxyl radical digestion of cross-linked DNA produced upon UV-irradiation of **16b-18b**. The strand opposite the C-nucleotide is 5'-<sup>32</sup>P-labeled.

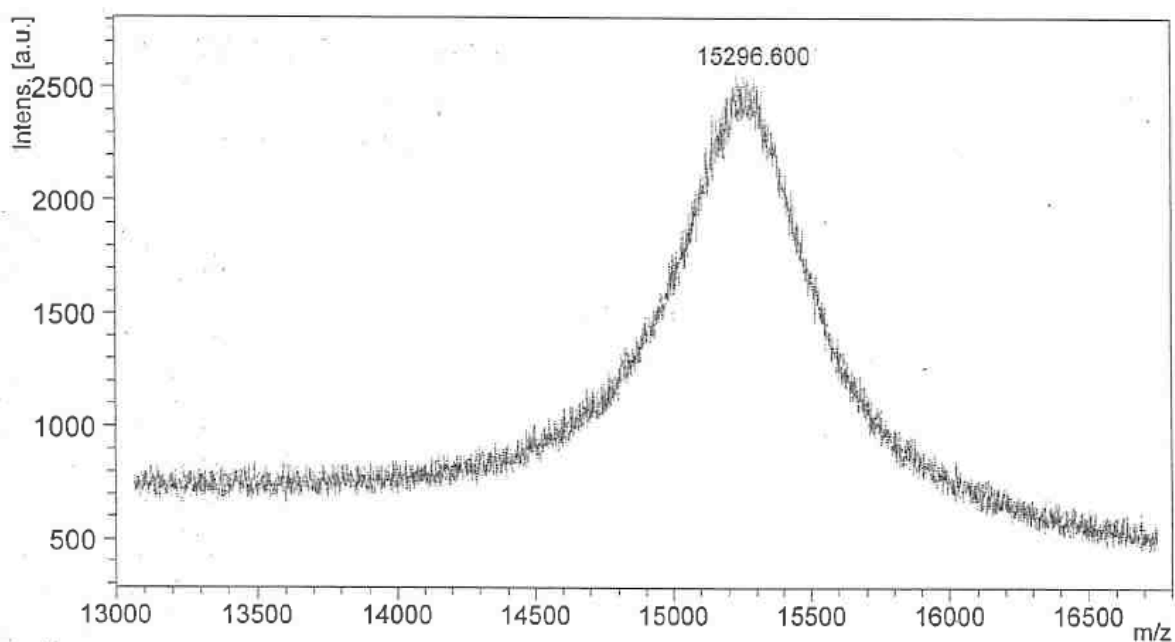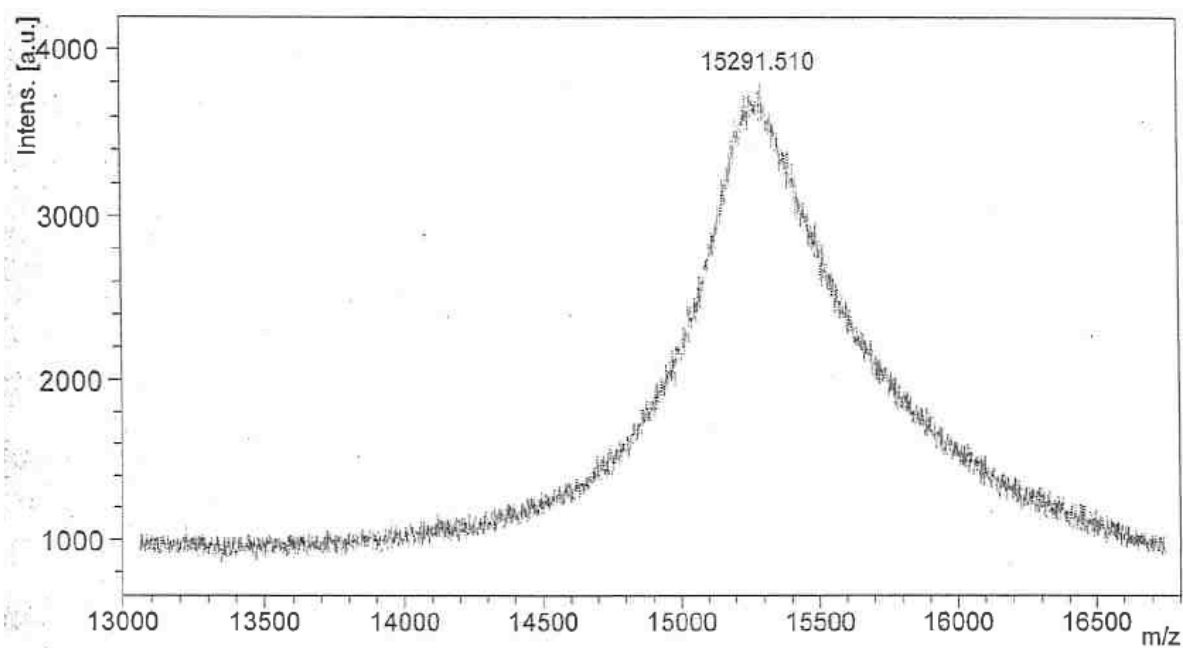

**Supporting Information Figure 3.** MALDI-TOF MS of interstrand cross-link products from irradiation of C-nucleotide containing duplexes. Top: from irradiation of **16b**. Calc'd mass: 15,293.0, Observed mass: 15,296.6. Bottom: from irradiation of **18b**. Calc'd mass: 15,279.0, Observed mass: 15,291.5.

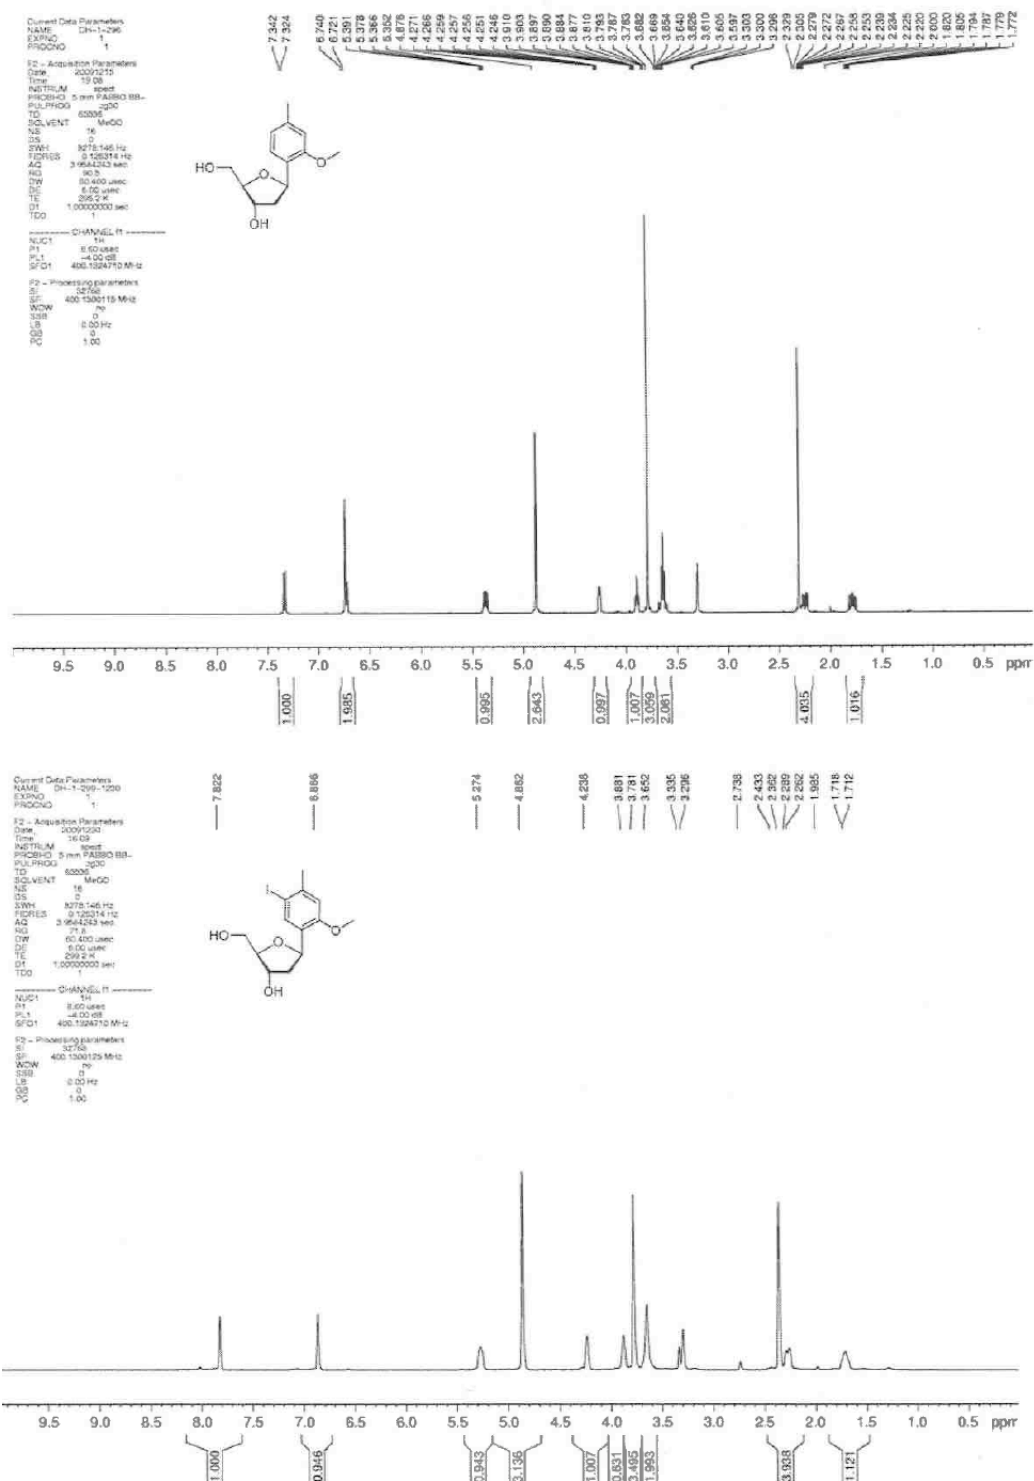

Supporting Information Figure 4. NMR spectra of known compounds used to prepare oligonucleotide 13.





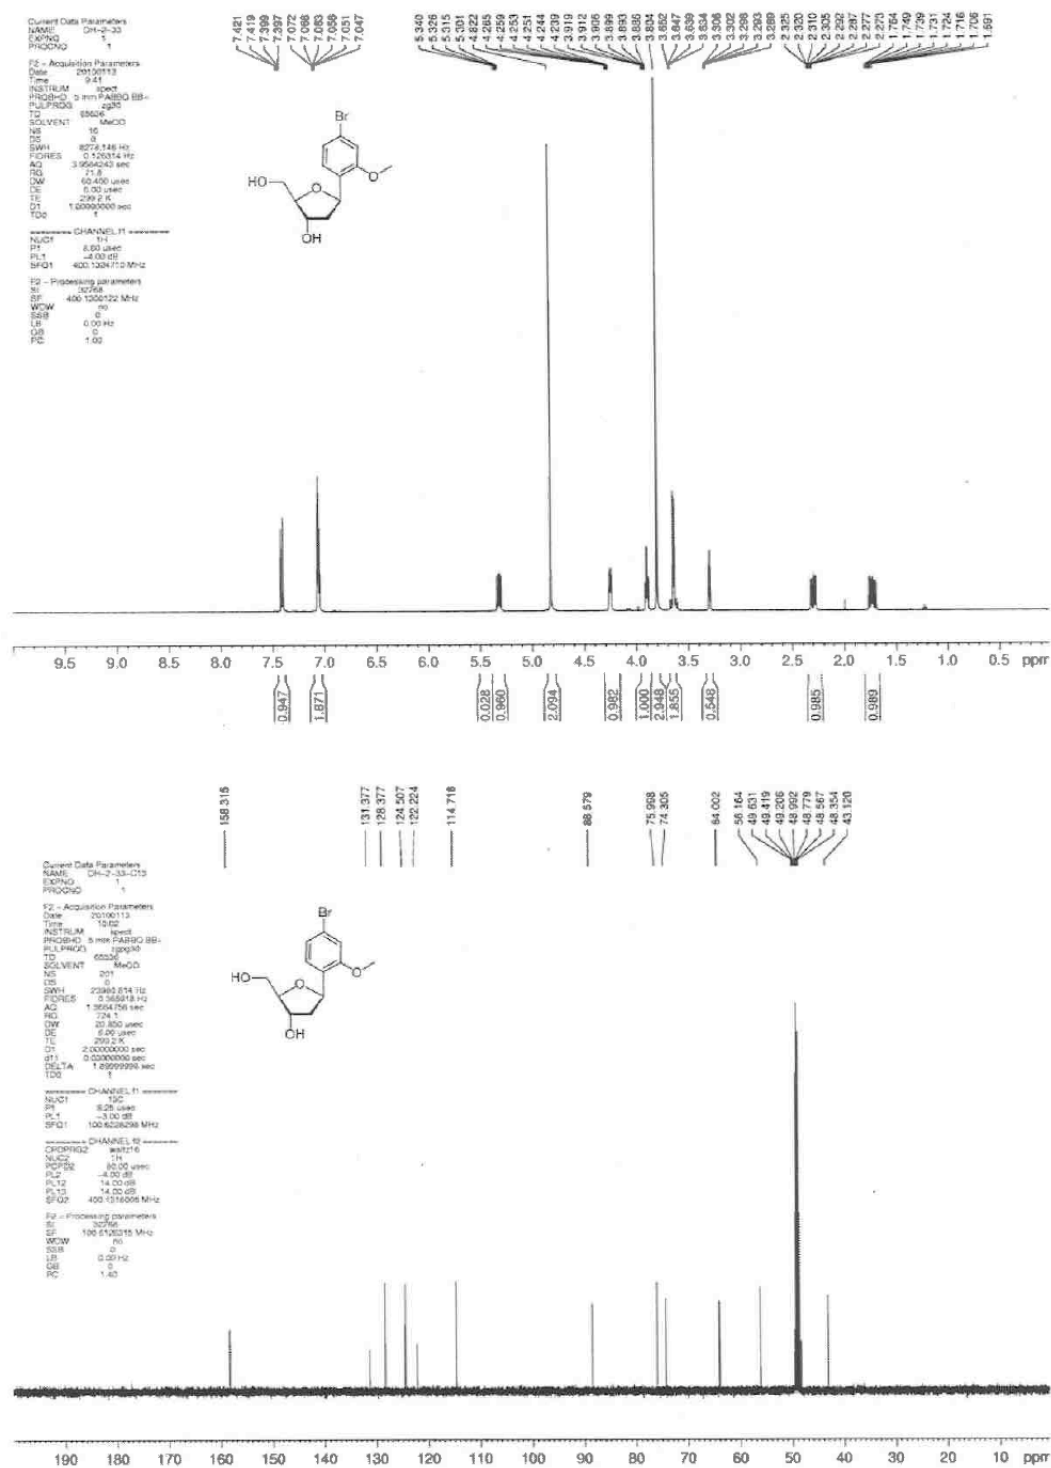

Supporting Information Figure 5. NMR spectra of **5**. Top: <sup>1</sup>H NMR Bottom: <sup>13</sup>C NMR.

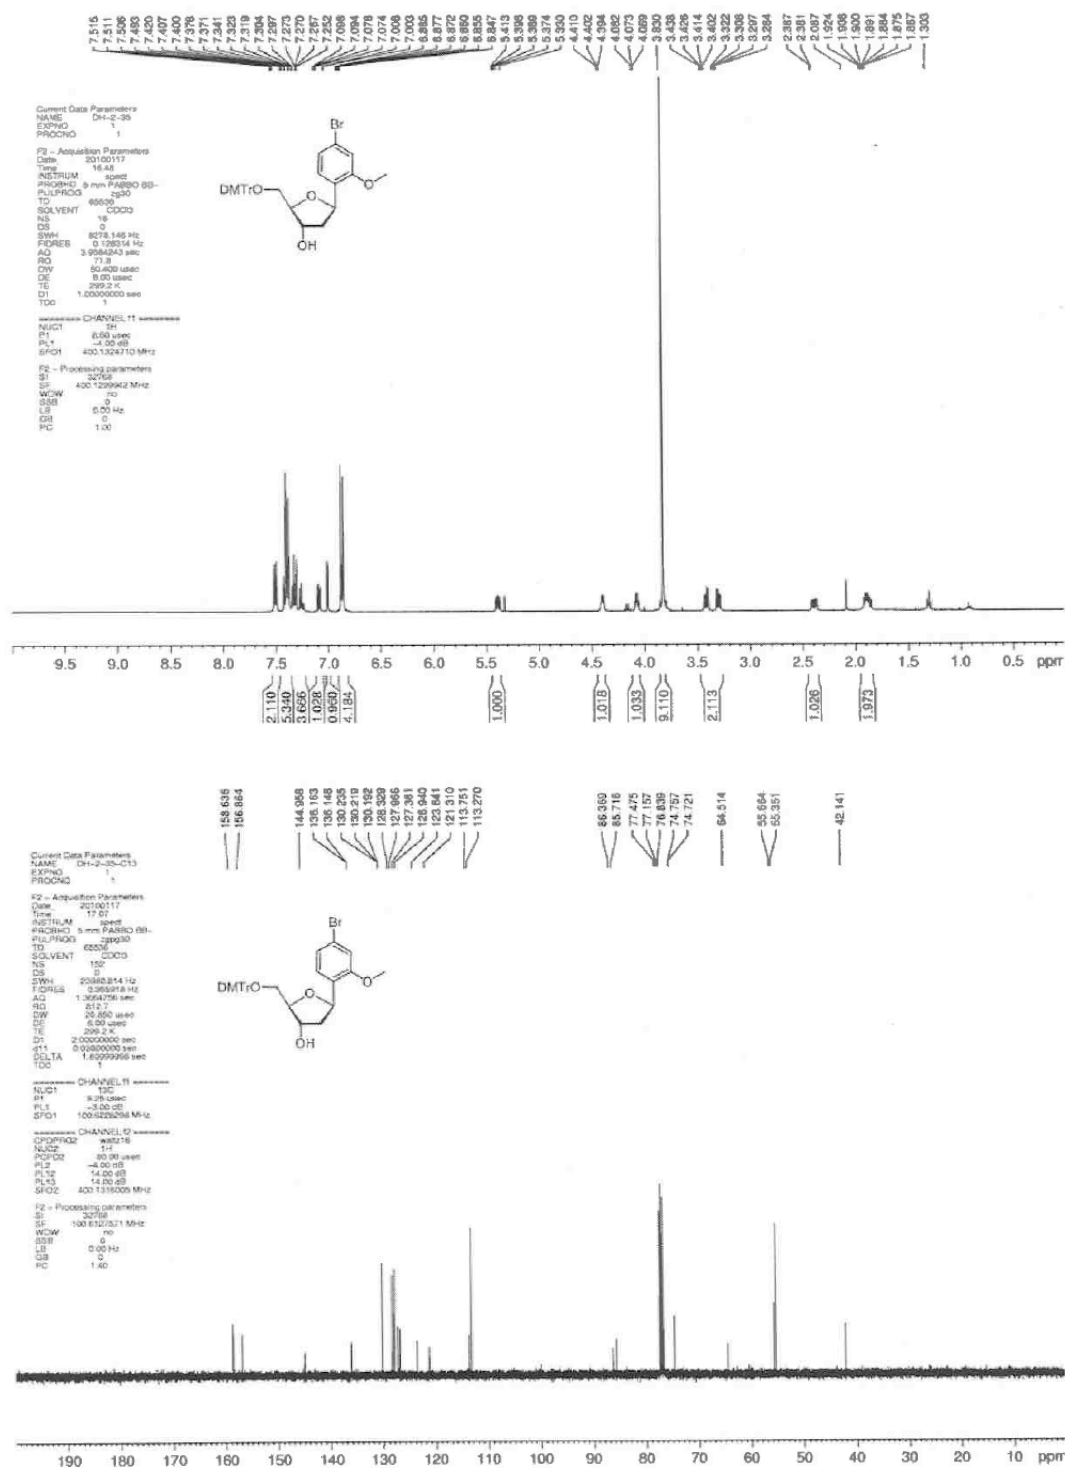

Supporting Information Figure 6. NMR spectra of dimethoxytritylated 5. Top: <sup>1</sup>H NMR Bottom: <sup>13</sup>C NMR.



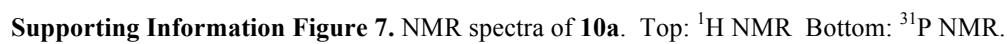

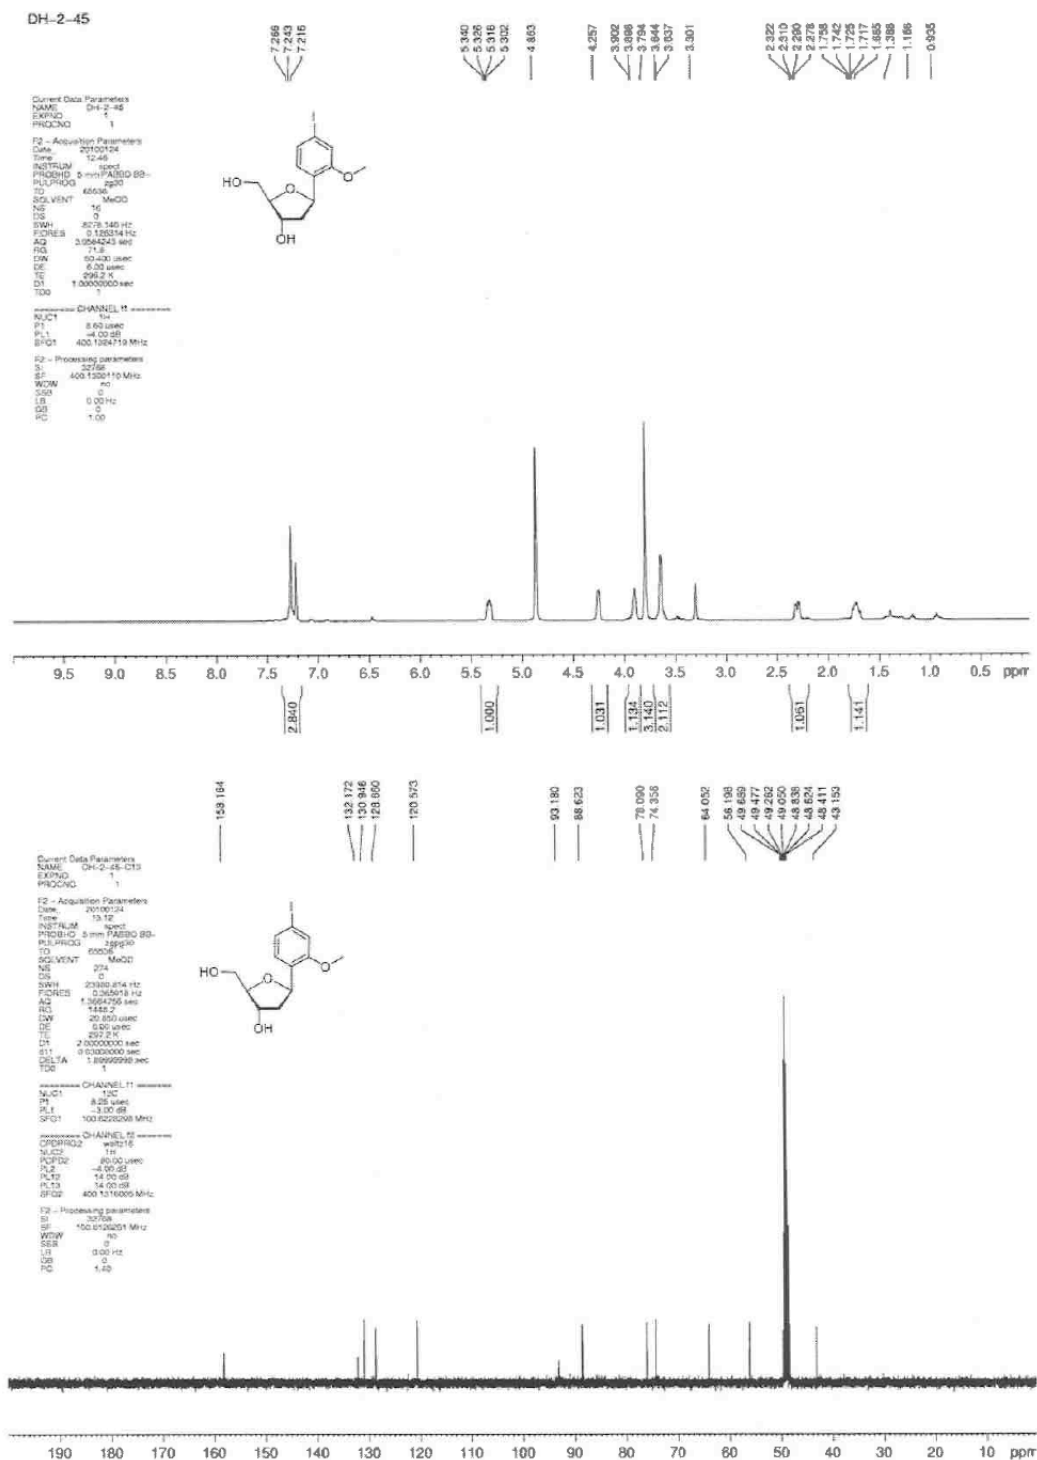

Supporting Information Figure 8. NMR spectra of 6. Top: <sup>1</sup>H NMR Bottom: <sup>13</sup>C NMR.

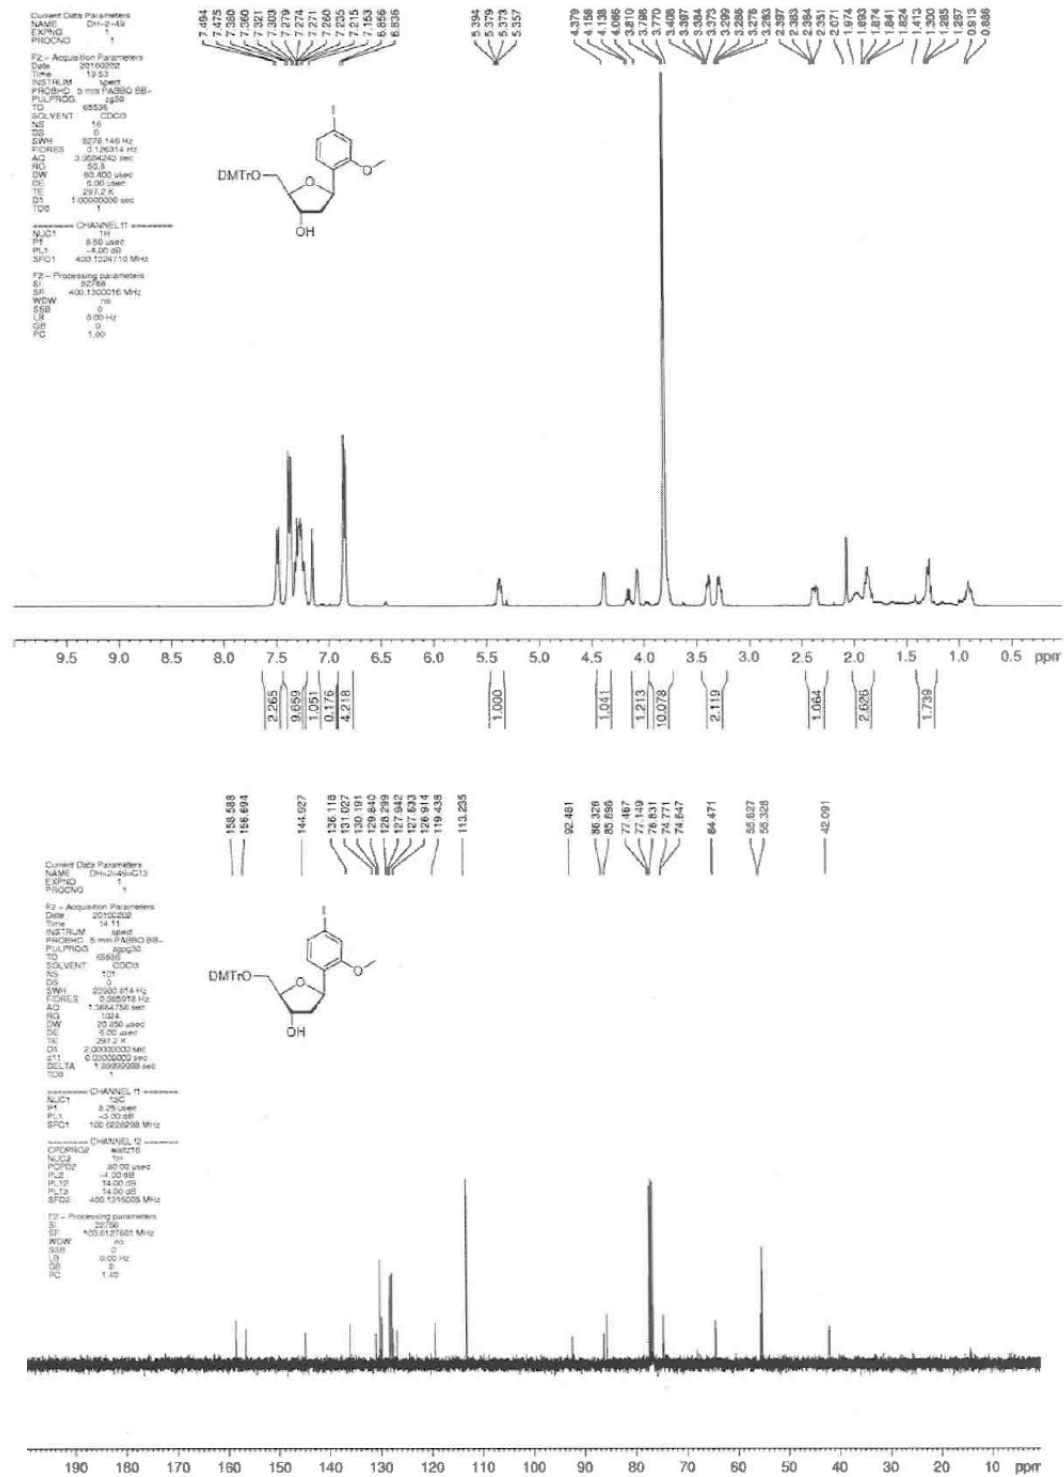

Supporting Information Figure 9. NMR spectra of dimethoxytritylated 6. Top: <sup>1</sup>H NMR Bottom: <sup>13</sup>C NMR.



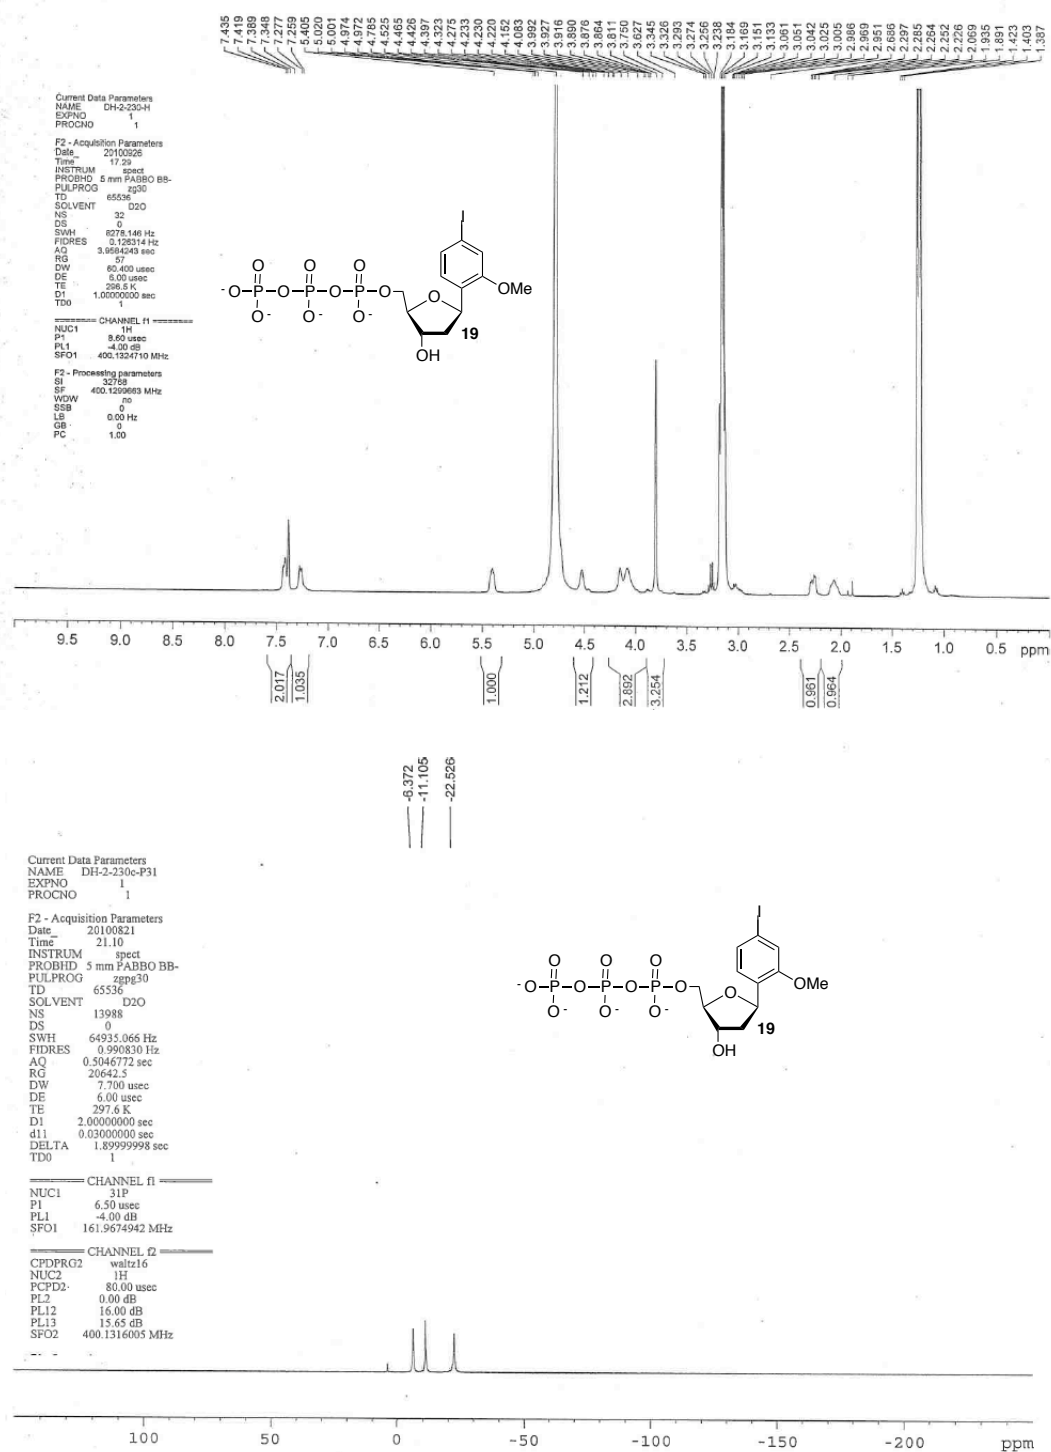

Supporting Information Figure 11. NMR spectra of 19. Top: <sup>1</sup>H NMR Bottom: <sup>31</sup>P NMR.

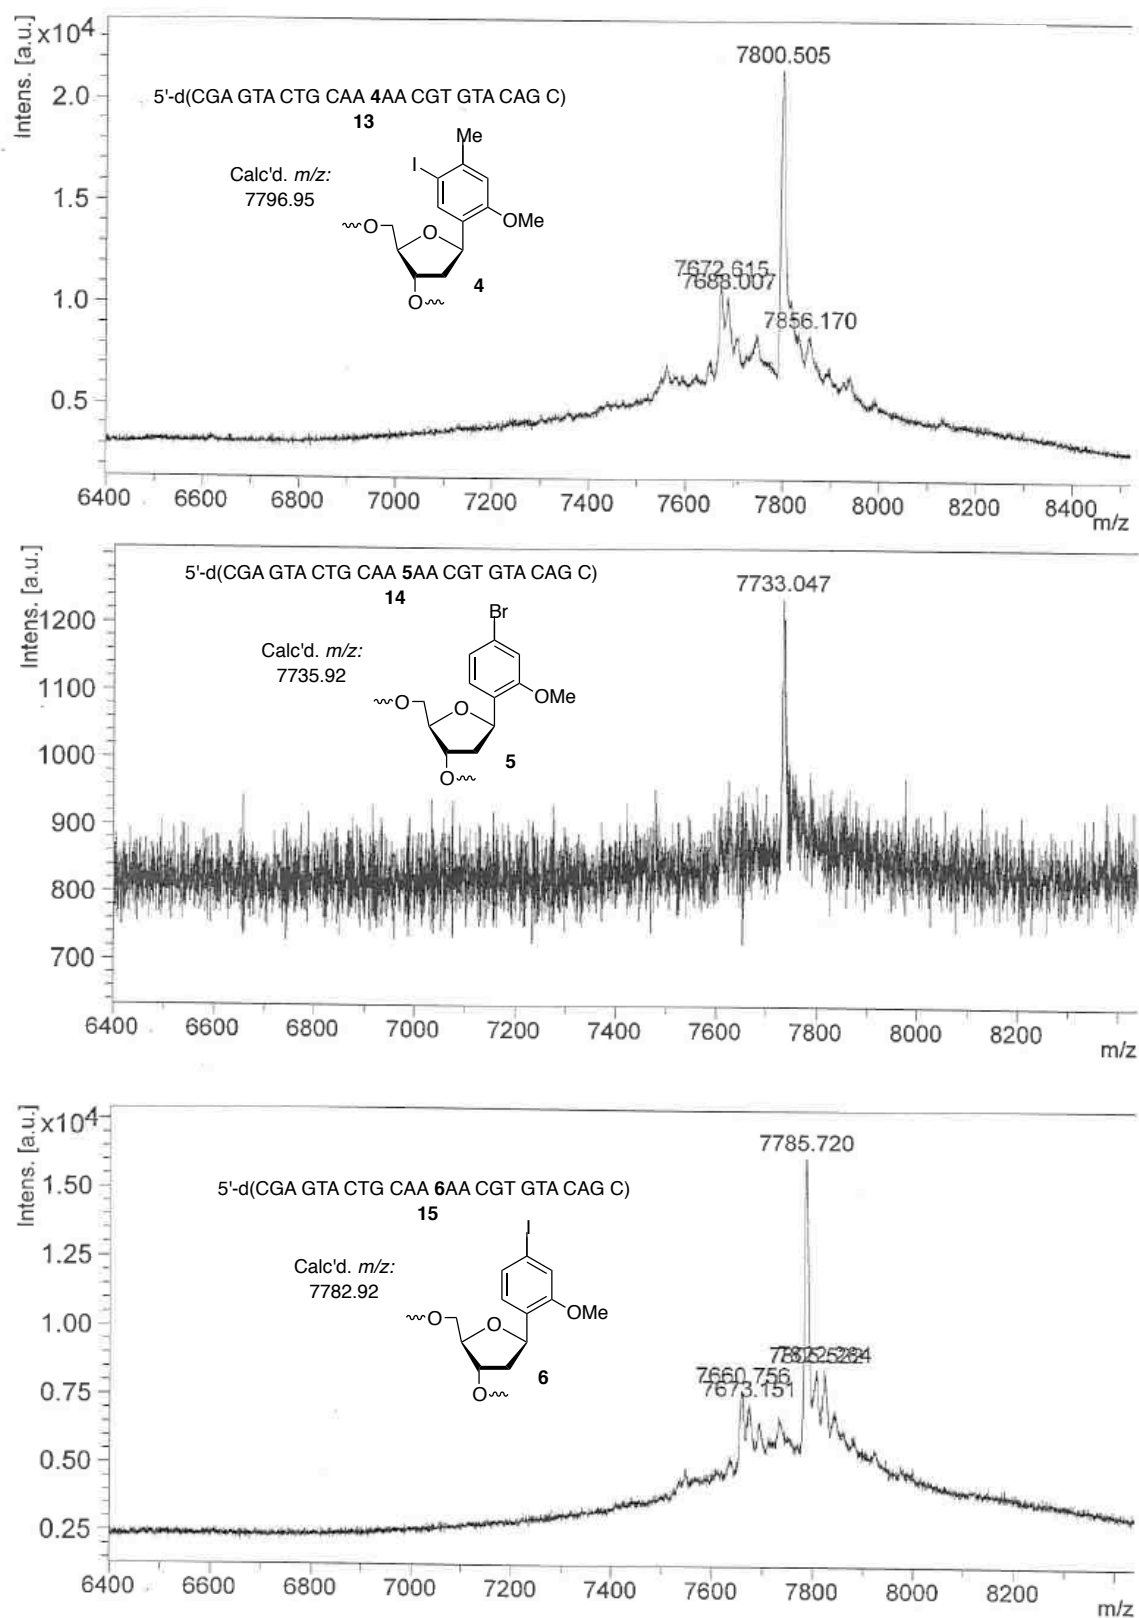

**Supporting Information Figure 12.** MALDI-TOF MS of oligonucleotides containing C-nucleotides (**13-15**).

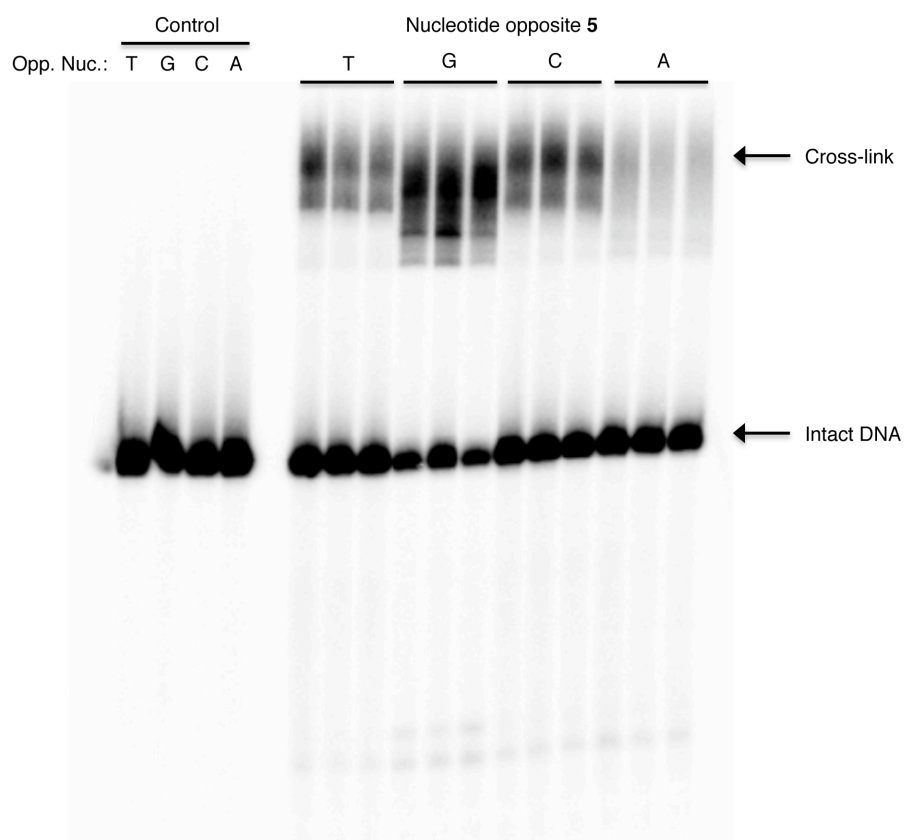

**Supporting Information Figure 13.** Sample ICL gel upon UV-irradiation of 5'-<sup>32</sup>-P-**17a-d**. Controls correspond to otherwise identical duplex in which thymidine is substituted for **5**
